# Supplementary material
Source: PubMed Central journal article supplement (PMC4776346)
Supplement: NIHMS64878-supplement-Supplementary_Material.pdf [file NIHMS64878-supplement-Supplementary_Material.pdf]

1 **Supplementary Material Hardy-Weinberg Equilibrium**

2

3

4 Briefly, in the case of a single locus with two alleles (A and S) where  $p$  is the allele frequency of the dominant

5 allele,  $q$  is the frequency of the recessive allele (HbA and HbS respectively in the present study) and  $p+q=1$ ,

6 genotype frequencies assuming HWE are equivalent to  $p^2$  for homozygous dominants (AA),  $2pq$  for

7 heterozygotes (AS),  $q^2$  for homozygous recessives (SS) and  $p^2+2pq+q^2=1$  (Equation 1). Considering a three-

8 allele case (for example HbA, HbS and HbC), the corresponding equation is  $p^2+2pq+q^2+2pr+r^2+2qr=1$

9 (Equation 2) where  $r$  is the third allele (i.e.  $r^2$ ,  $2pr$  and  $2qr$  are CC, AC and SC proportions respectively).

10

11 **Equation 1:**  $p^2 + 2pq + q^2 = 1$

12 *where  $p$  and  $q$  are the proportions of the two alleles (e.g. HbA and HbS).*

13

14 **Equation 2:**  $p^2 + 2pq + q^2 + 2pr + r^2 + 2qr = 1$

15 *where  $p$ ,  $q$  and  $r$  are the proportions of the three alleles (HbA, HbS and HbC).*

16 For each study population, we calculated the expected genotype frequencies based on these equations

17 (Table 1). Radar charts, created with a slightly modified version of the radarchart function included in the

18 “fmsb” package in R (see code in the Supplementary Information),<sup>82</sup> are used to illustrate the relative

19 differences between observed and expected genotype counts for selected studies (Figure 2).
